# Supplementary material
Source: MDPI journal article supplement (https://www.mdpi.com/2075-4701/7/3/95)
Supplement: s1 [file s1]

Archive with 6 entries (6 files):
- metals-07-00095-g001.pdf
- metals-07-00095-g002.pdf
- metals-07-00095-g003.pdf
- metals-07-00095-g004.pdf
- metals-07-00095-g005.pdf
- metals-07-00095-g006.pdf
