# Supplementary material
Source: MDPI journal article supplement (https://www.mdpi.com/2075-4701/7/3/95)

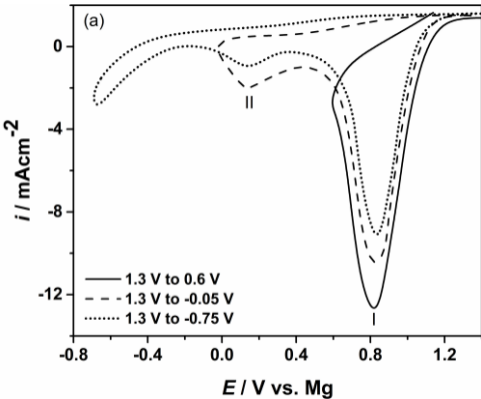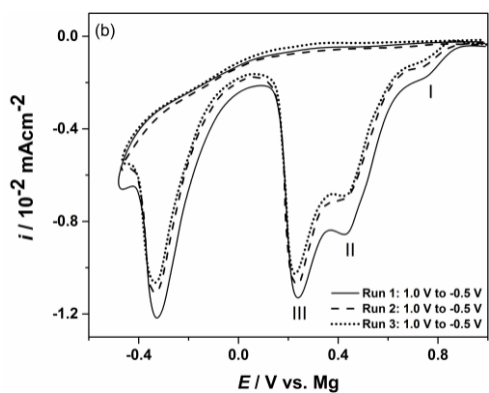

Supplement: s1 [file s1 › metals-07-00095-g001.pdf]

(a)

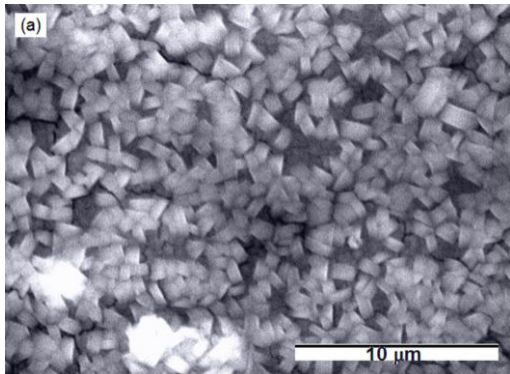

(b)

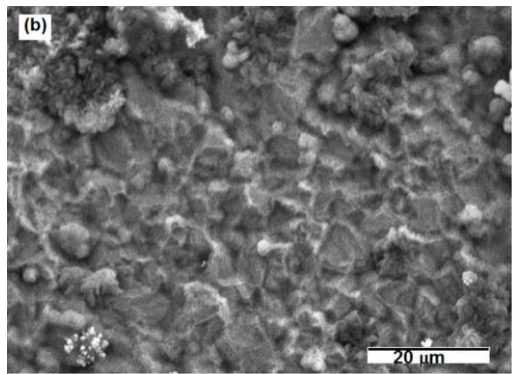

Supplement: s1 [file s1 › metals-07-00095-g002.pdf]

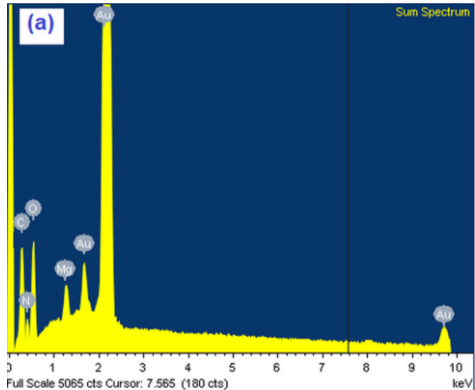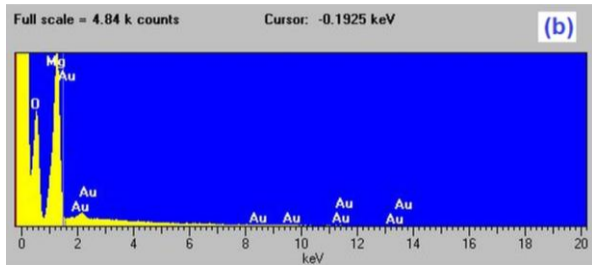

Supplement: s1 [file s1 › metals-07-00095-g003.pdf]

(a)

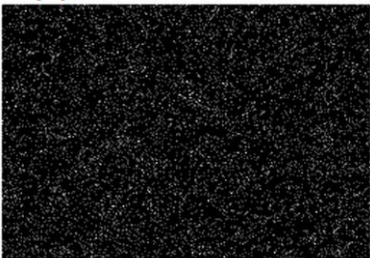

Mg Ka\_1

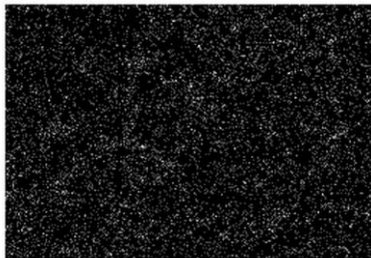

O Ka1

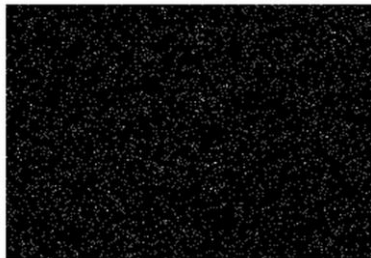

N Ka 1 2

(b)

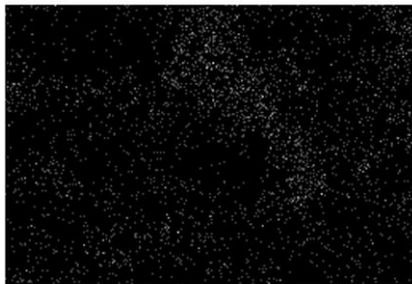

Mg Ka1\_2

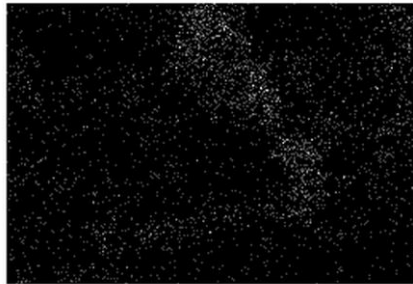

O Ka1

Supplement: s1 [file s1 › metals-07-00095-g004.pdf]

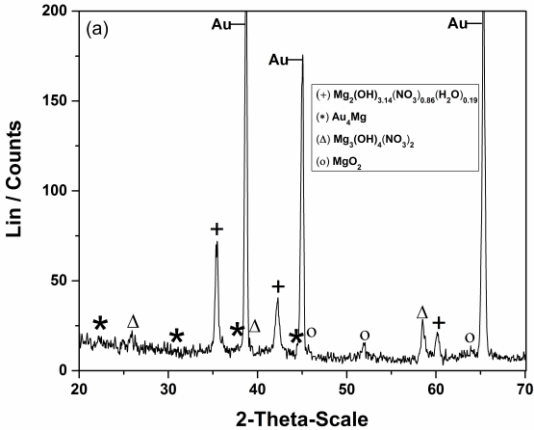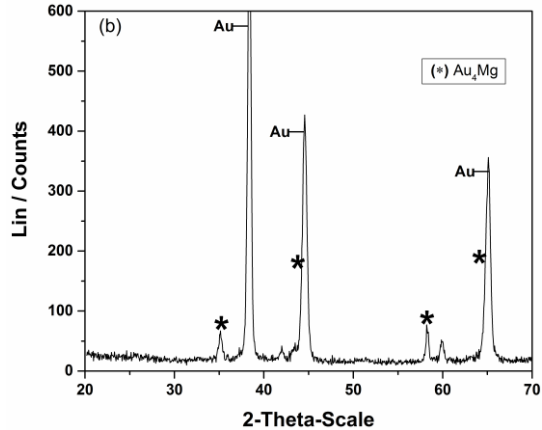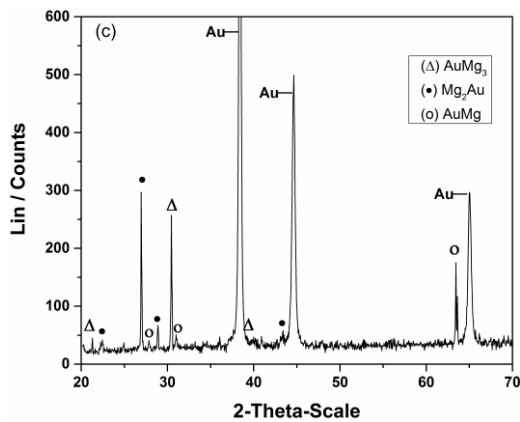

Supplement: s1 [file s1 › metals-07-00095-g005.pdf]

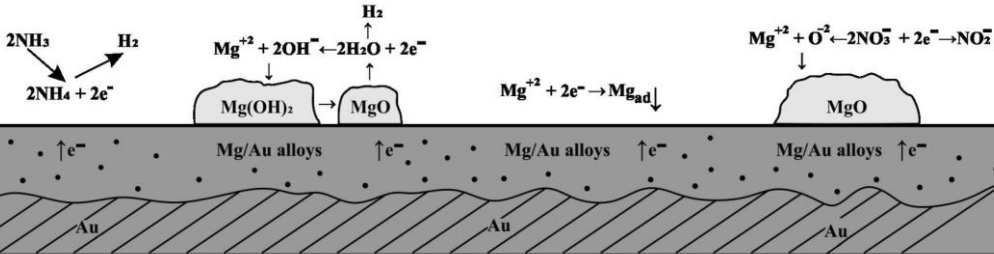

Supplement: s1 [file s1 › metals-07-00095-g006.pdf]
